# Supplementary material
Source: publisher figshare collection journal article supplement (https://karger.figshare.com/articles/dataset/_/5128261)
Supplement: Supplementary file 1 [file 1]

**Fig. S1. RIP140 expression in PM transfected with WT or Y3F mutant RIP140 followed by control or LPS stimulation.**

Protein and mRNA level were analyzed by western blotting and qPCR.

**Fig. S2. Knockdown efficiency. The expression level of RIP140 protein (left) and mRNA (right) in WT and M $\phi$ RIP140KD mice. .**

**Fig. S3. Altering RIP140 levels affects IL4-induced M2 activation.**

**a** qPCR analyses of M2 gene expression in control vs. RIP140 over-expressing (left) or RIP140-knockdown (right) mouse PM, with or without IL-4 stimulation. **b** Arginase activity assay. Data are presented as urea concentrations, and show three experimental results (means $\pm$ s.d.). Student's t-test (n=3) was used (\*P<0.05; \*\*P<0.01; \*\*\*P<0.001).

**Fig. S4. In vitro wound healing assay.**

In vitro wound healing was assessed using 293TN cells supplemented with conditioned medium of macrophage with RIP140 over-expression (Flag-RIP140) or RIP140-knockdown (RIP140siRNA). IL-4 was used to trigger M2 polarization of macrophages whereas Ctrl denotes treatment with a control solution without cytokine.

**Fig. S5. Bone marrow transplantation efficiency validation.**

GFP intensity in bone marrow cells of the receiving mice following BMT with cells carrying either Ctrl-GFP, WT-RIP140 or Y3F-RIP140.

**Fig. S6. Non-degradable mutant RIP140 (RIP140-Y3F) can also translocate to the cytosol in macrophages upon IL-4 treatment.**

**a** Western blot analyses of FLAG-RIP140 Y3F from total cell lysate in IL-4 (10ng/ml) treated RAW264.7 cells. **b** Western blot analyses of FLAG-RIP140 Y3F from the cytosolic/nuclear fractions of IL-4 (10ng/ml) treated RAW264.7 cells. Data show three experimental results.

**Fig. S7. Endogenous RIP140 translocates to the cytosol in macrophages upon IL-13 treatment.**

**a** Western blot analyses of endogenous RIP140 from total cell lysate in IL-13 (10ng/ml) treated RAW264.7 cells. **b** Western blot analyses of RIP140 from the cytosolic/nuclear fractions of IL-13 (10ng/ml) treated RAW264.7 cells. Data show three experimental results.

**Fig. S8. RIP140 knockdown still increases pSTAT6 levels in macrophages treated with kinase inhibitor, but fails to affect PTP1B gene expression.**

**a** Western blot analyses of phospho-STAT6 and STAT6 levels in IL-4-treated (10ng/ml) control vs. RIP140 knockdown RAW264.7 cells, with or without pretreatment with kinase inhibitor Staurosporine (50ng/ml). **b** qRT-PCR analyses of RIP140 and PTP1B mRNA levels in control (flag) vs. RIP140-overexpressing RAW264.7 cells with or without IL-4 treatment (10ng/ml, 6hr). Data show three experimental results (means±s.d.). Student's t-test (n=3) was used (\*P<0.05; \*\*P<0.01; \*\*\*P<0.001).

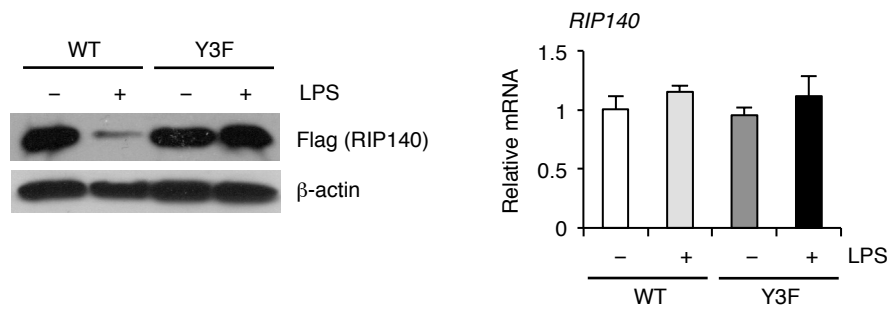

**Fig. S1 Lin et al.**

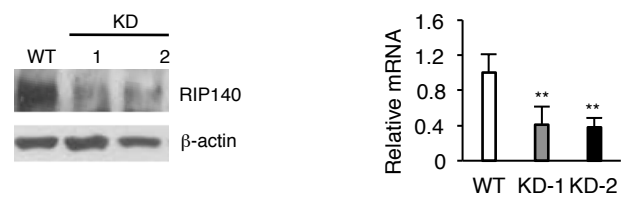

**Fig. S2 Lin et al.**

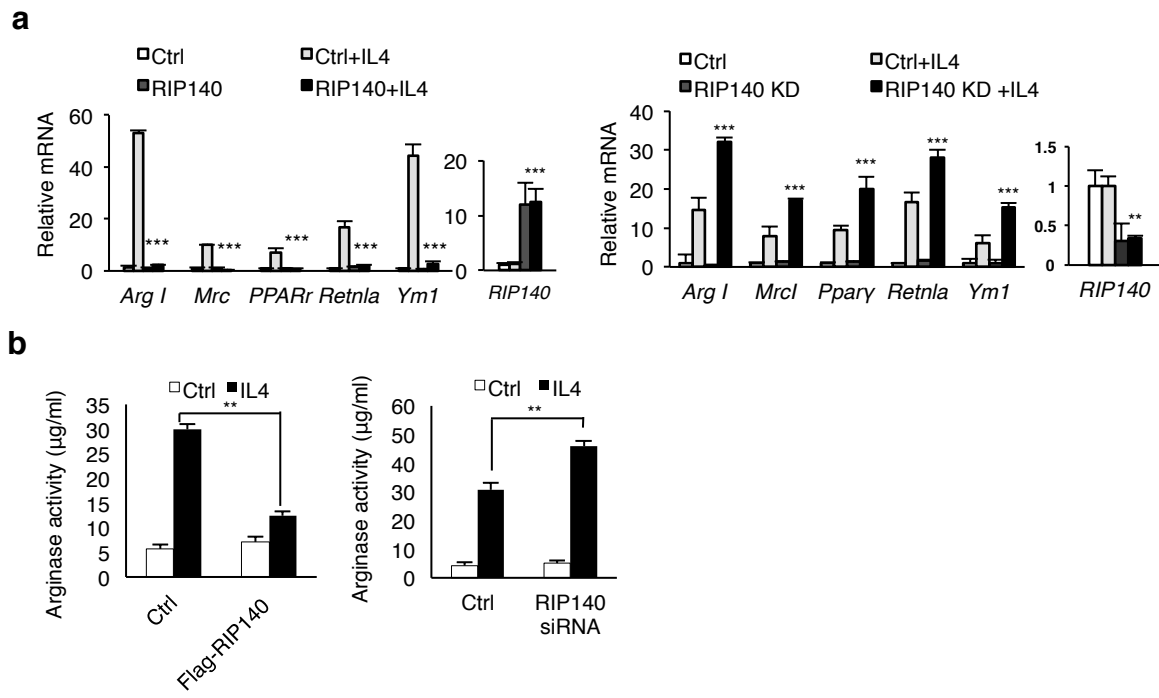

**Fig. S3 Lin et al.**

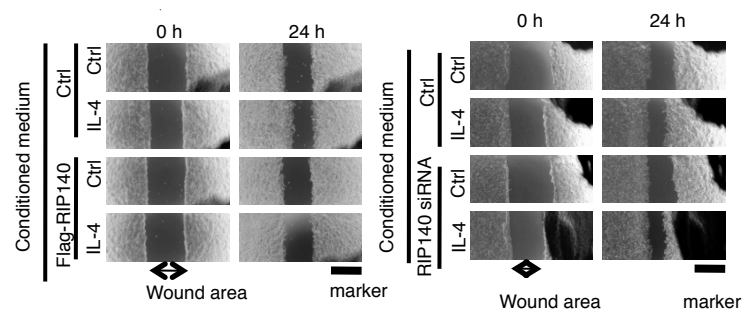

**Fig. S4 Lin et al.**

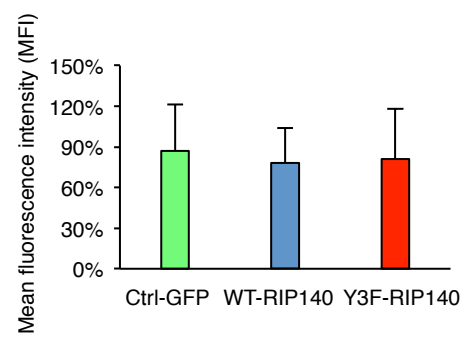

**Fig. S5 Lin et al.**

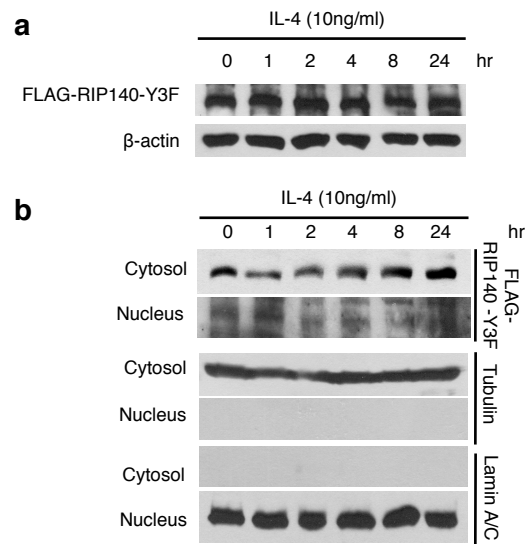

**Fig. S6 Lin et al.**



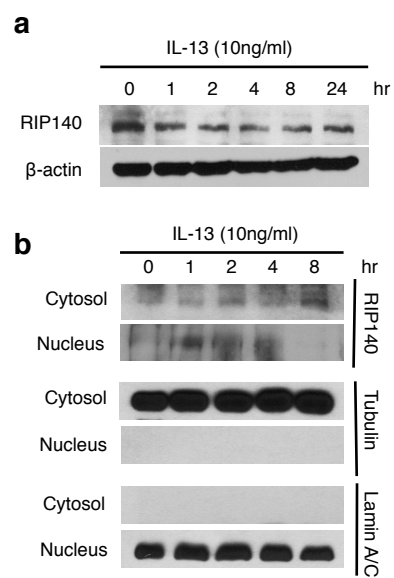

**Fig. S7 Lin et al.**

**a**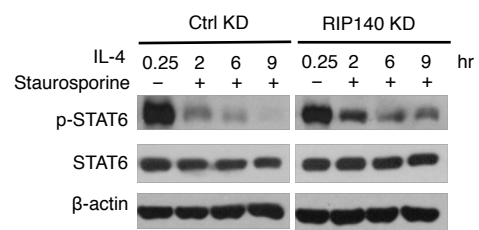**b**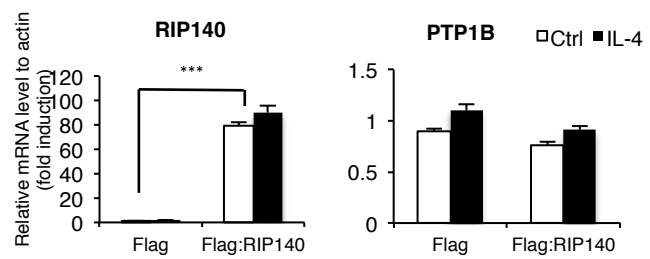**Fig. S8 Lin et al.**
